# Supplementary material
Source: publisher figshare collection journal article supplement (https://frontiersin.figshare.com/ndownloader/files/13169360)
Supplement: Supplementary file [file 13169360]

### Supplementary Table 1 : Scoring of morbidity after infection

Mice were sacrificed when reaching a score >3.

| Score       | 1      | 2  | 3         | 4  | 5        |
|-------------|--------|----|-----------|----|----------|
| Temperature | 38     | 35 | 33        | 30 | 28       |
| Weight (%)  | 100    | 90 | 85        | 80 | < 80     |
| Weakness    | No     |    | Moderate  |    | Extented |
| Mobility    | Normal |    | Moderate  |    | None     |
| Ruffled fur | No     |    | Localised |    | Extented |
| Lordosis    | No     |    | Moderate  |    | Yes      |
